# Supplementary material for: Genome-Wide Association Study of the Reproductive Traits of the Dazu Black Goat (Capra hircus) Using Whole-Genome Resequencing
Source: MDPI journal article supplement (doi:10.3390/genes14101960), 2023-10-19
Supplement: s1 [file s1]

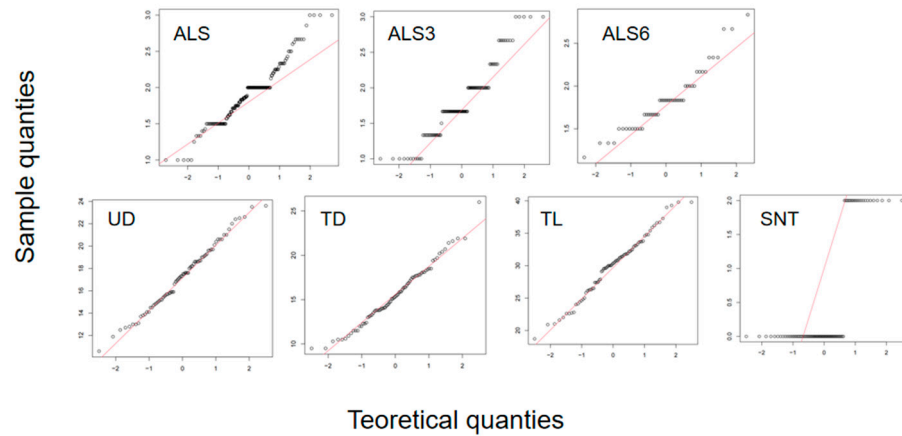

**Figure S1.** QQ Diagram for normality Test of Reproductive traits

**Table S1.** Enrichment Analysis of candidate genes for Reproductive traits by GO

| Trait | ontology | ID         | Description                                                                                      | <i>p</i> -value |
|-------|----------|------------|--------------------------------------------------------------------------------------------------|-----------------|
| ALS6  | MF       | GO:0022824 | transmitter-gated ion channel activity                                                           | 6.46883E-05     |
|       | MF       | GO:0022835 | transmitter-gated channel activity                                                               | 6.46883E-05     |
|       | MF       | GO:0030594 | neurotransmitter receptor activity                                                               | 0.00011605      |
|       | MF       | GO:0005230 | extracellular ligand-gated ion channel activity                                                  | 0.000164267     |
|       | MF       | GO:0015276 | ligand-gated ion channel activity                                                                | 0.000498167     |
|       | MF       | GO:0022834 | ligand-gated channel activity                                                                    | 0.000498167     |
|       | MF       | GO:0015318 | inorganic molecular entity transmembrane transporter activity                                    | 0.000895914     |
|       | MF       | GO:0015075 | ion transmembrane transporter activity                                                           | 0.001337601     |
|       | MF       | GO:0022836 | gated channel activity                                                                           | 0.003148918     |
|       | MF       | GO:0005216 | ion channel activity                                                                             | 0.005171508     |
|       | MF       | GO:0015299 | solute:proton antiporter activity                                                                | 0.005414759     |
|       | MF       | GO:0008066 | glutamate receptor activity                                                                      | 0.005954942     |
|       | MF       | GO:0015267 | channel activity                                                                                 | 0.006464157     |
|       | MF       | GO:0022803 | passive transmembrane transporter activity                                                       | 0.006464157     |
|       | MF       | GO:1904315 | transmitter-gated ion channel activity involved in regulation of postsynaptic membrane potential | 0.008113328     |
|       | MF       | GO:0015491 | cation:cation antiporter activity                                                                | 0.008652338     |
|       | MF       | GO:0099529 | neurotransmitter receptor activity involved in regulation of postsynaptic membrane potential     | 0.008652338     |
|       | MF       | GO:0015298 | solute:cation antiporter activity                                                                | 0.009191114     |
|       | MF       | GO:0019213 | deacetylase activity                                                                             | 0.009191114     |
|       | MF       | GO:0005231 | excitatory extracellular ligand-gated ion channel activity                                       | 0.009729656     |
|       | MF       | GO:0016597 | amino acid binding                                                                               | 0.009729656     |
|       | MF       | GO:0098960 | postsynaptic neurotransmitter receptor activity                                                  | 0.012418853     |
|       | MF       | GO:0015297 | antiporter activity                                                                              | 0.01617391      |
|       | MF       | GO:0005254 | chloride channel activity                                                                        | 0.022584571     |
|       | MF       | GO:0008146 | sulfotransferase activity                                                                        | 0.02311728      |
|       | MF       | GO:0043177 | organic acid binding                                                                             | 0.023649757     |
|       | MF       | GO:0005253 | anion channel activity                                                                           | 0.026839747     |
|       | MF       | GO:0015108 | chloride transmembrane transporter activity                                                      | 0.0273706       |
|       | MF       | GO:0016782 | transferase activity, transferring sulfur-containing groups                                      | 0.02896177      |

|    |            |                                                    |             |
|----|------------|----------------------------------------------------|-------------|
| MF | GO:0015081 | sodium ion transmembrane transporter activity      | 0.03108009  |
| MF | GO:0031406 | carboxylic acid binding                            | 0.03372279  |
| MF | GO:0052689 | carboxylic ester hydrolase activity                | 0.03635972  |
| MF | GO:0015078 | proton transmembrane transporter activity          | 0.037939112 |
| MF | GO:0015103 | inorganic anion transmembrane transporter activity | 0.041091685 |
| MF | GO:0022853 | active ion transmembrane transporter activity      | 0.048415555 |
| CC | GO:0045211 | postsynaptic membrane                              | 0.00053967  |
| CC | GO:0097060 | synaptic membrane                                  | 0.000983841 |
| CC | GO:0098794 | postsynapse                                        | 0.00288054  |
| CC | GO:0098982 | GABA-ergic synapse                                 | 0.010528333 |
| CC | GO:0034707 | chloride channel complex                           | 0.013520082 |
| CC | GO:0098590 | plasma membrane region                             | 0.01470527  |
| CC | GO:0045202 | synapse                                            | 0.017444587 |
| BP | GO:0001941 | postsynaptic membrane organization                 | 0.004823627 |
| BP | GO:0015012 | heparan sulfate proteoglycan biosynthetic process  | 0.006267306 |
| BP | GO:0007340 | acrosome reaction                                  | 0.006748184 |
| BP | GO:0007628 | adult walking behavior                             | 0.006748184 |
| BP | GO:0090659 | walking behavior                                   | 0.007228886 |
| BP | GO:0043113 | receptor clustering                                | 0.007709414 |
| BP | GO:0030201 | heparan sulfate proteoglycan metabolic process     | 0.008189768 |
| BP | GO:0051668 | localization within membrane                       | 0.010109439 |
| BP | GO:0007218 | neuropeptide signaling pathway                     | 0.012505107 |
| BP | GO:0033692 | cellular polysaccharide biosynthetic process       | 0.012505107 |
| BP | GO:0006024 | glycosaminoglycan biosynthetic process             | 0.013940419 |
| BP | GO:0030166 | proteoglycan biosynthetic process                  | 0.014418509 |
| BP | GO:0000271 | polysaccharide biosynthetic process                | 0.014896424 |
| BP | GO:0006023 | aminoglycan biosynthetic process                   | 0.015851734 |
| BP | GO:0034637 | cellular carbohydrate biosynthetic process         | 0.016329128 |
| BP | GO:1903510 | mucopolysaccharide metabolic process               | 0.016806349 |
| BP | GO:0006885 | regulation of pH                                   | 0.017283396 |
| BP | GO:0008344 | adult locomotory behavior                          | 0.018236969 |
| BP | GO:0099173 | postsynapse organization                           | 0.018713495 |
| BP | GO:0006029 | proteoglycan metabolic process                     | 0.019666027 |
| BP | GO:0044264 | cellular polysaccharide metabolic process          | 0.02156901  |
| BP | GO:0007338 | single fertilization                               | 0.022044323 |
| BP | GO:0050905 | neuromuscular process                              | 0.022044323 |
| BP | GO:0055067 | monovalent inorganic cation homeostasis            | 0.022519462 |
| BP | GO:0030203 | glycosaminoglycan metabolic process                | 0.022994428 |
| BP | GO:0005976 | polysaccharide metabolic process                   | 0.023943842 |
| BP | GO:0006022 | aminoglycan metabolic process                      | 0.025366664 |
| BP | GO:0044272 | sulfur compound biosynthetic process               | 0.025366664 |
| BP | GO:0009566 | fertilization                                      | 0.027734577 |
| BP | GO:0007601 | visual perception                                  | 0.028207641 |
| BP | GO:0050953 | sensory perception of light stimulus               | 0.029625798 |
| BP | GO:0030534 | adult behavior                                     | 0.031042403 |
| BP | GO:0016051 | carbohydrate biosynthetic process                  | 0.038102174 |
| BP | GO:0007626 | locomotory behavior                                | 0.041383499 |
| BP | GO:0044262 | cellular carbohydrate metabolic process            | 0.049317478 |

|    |    |            |                                                                      |             |
|----|----|------------|----------------------------------------------------------------------|-------------|
| UD | MF | GO:0015662 | ion transmembrane transporter activity,<br>phosphorylative mechanism | 0.00141059  |
|    | MF | GO:0019829 | ATPase-coupled cation transmembrane<br>transporter activity          | 0.002604167 |
|    | MF | GO:0042625 | ATPase-coupled ion transmembrane<br>transporter activity             | 0.002604167 |
|    | MF | GO:0015079 | potassium ion transmembrane transporter<br>activity                  | 0.009982639 |
|    | MF | GO:0046873 | metal ion transmembrane transporter activity                         | 0.022677951 |
|    | MF | GO:0022890 | inorganic cation transmembrane transporter<br>activity               | 0.032335069 |
|    | MF | GO:0008324 | cation transmembrane transporter activity                            | 0.035698785 |
|    | MF | GO:0015318 | inorganic molecular entity transmembrane<br>transporter activity     | 0.045898438 |
| TD | MF | GO:0098631 | cell adhesion mediator activity                                      | 0.001085069 |
|    | MF | GO:0050839 | cell adhesion molecule binding                                       | 0.008029514 |
|    | CC | GO:0099061 | integral component of postsynaptic density<br>membrane               | 0.001208094 |
|    | CC | GO:0099146 | intrinsic component of postsynaptic density<br>membrane              | 0.001409443 |
|    | CC | GO:0098839 | postsynaptic density membrane                                        | 0.001610792 |
|    | CC | GO:0099060 | integral component of postsynaptic<br>specialization membrane        | 0.001912816 |
|    | CC | GO:0098948 | intrinsic component of postsynaptic<br>specialization membrane       | 0.002114165 |
|    | CC | GO:0099634 | postsynaptic specialization membrane                                 | 0.002416188 |
|    | CC | GO:0099055 | integral component of postsynaptic membrane                          | 0.002919561 |
|    | CC | GO:0098936 | intrinsic component of postsynaptic membrane                         | 0.003221585 |
|    | CC | GO:0098685 | Schaffer collateral - CA1 synapse                                    | 0.003523608 |
|    | CC | GO:0099699 | integral component of synaptic membrane                              | 0.003926306 |
|    | CC | GO:0099240 | intrinsic component of synaptic membrane                             | 0.004329004 |
|    | CC | GO:0014069 | postsynaptic density                                                 | 0.006745193 |
|    | CC | GO:0032279 | asymmetric synapse                                                   | 0.006745193 |
|    | CC | GO:0045211 | postsynaptic membrane                                                | 0.007449914 |
|    | CC | GO:0099572 | postsynaptic specialization                                          | 0.007751938 |
|    | CC | GO:0098984 | neuron to neuron synapse                                             | 0.007953287 |
|    | CC | GO:0097060 | synaptic membrane                                                    | 0.010067452 |
|    | CC | GO:0098978 | glutamatergic synapse                                                | 0.011476895 |
|    | CC | GO:0098794 | postsynapse                                                          | 0.017316017 |
|    | CC | GO:0005887 | integral component of plasma membrane                                | 0.039766435 |
|    | CC | GO:0098590 | plasma membrane region                                               | 0.039967784 |
|    | CC | GO:0031226 | intrinsic component of plasma membrane                               | 0.043088694 |
|    | CC | GO:0045202 | synapse                                                              | 0.043692741 |
|    | BP | GO:0050770 | regulation of axonogenesis                                           | 0.005314652 |
|    | BP | GO:0098742 | cell-cell adhesion via plasma-membrane<br>adhesion molecules         | 0.009904578 |
|    | BP | GO:0050804 | modulation of chemical synaptic transmission                         | 0.014856867 |
|    | BP | GO:0099177 | regulation of trans-synaptic signaling                               | 0.014856867 |
|    | BP | GO:0050808 | synapse organization                                                 | 0.015460804 |
|    | BP | GO:0010975 | regulation of neuron projection development                          | 0.015943955 |
|    | BP | GO:0007409 | axonogenesis                                                         | 0.018359705 |
|    | BP | GO:0061564 | axon development                                                     | 0.020171518 |
|    | BP | GO:0048667 | cell morphogenesis involved in neuron<br>differentiation             | 0.023070419 |
|    | BP | GO:0007268 | chemical synaptic transmission                                       | 0.023311994 |
|    | BP | GO:0098916 | anterograde trans-synaptic signaling                                 | 0.023311994 |
|    | BP | GO:0099537 | trans-synaptic signaling                                             | 0.023674357 |
|    | BP | GO:0099536 | synaptic signaling                                                   | 0.02451987  |
|    | BP | GO:0048812 | neuron projection morphogenesis                                      | 0.025365382 |

|     |    |            |                                                                                      |             |
|-----|----|------------|--------------------------------------------------------------------------------------|-------------|
| TL  | BP | GO:0120039 | plasma membrane bounded cell projection morphogenesis                                | 0.02596932  |
|     | BP | GO:0048858 | cell projection morphogenesis                                                        | 0.026090108 |
|     | BP | GO:0120035 | regulation of plasma membrane bounded cell projection organization                   | 0.026090108 |
|     | BP | GO:0031344 | regulation of cell projection organization                                           | 0.02645247  |
|     | BP | GO:0032990 | cell part morphogenesis                                                              | 0.026694045 |
|     | BP | GO:0034330 | cell junction organization                                                           | 0.028264283 |
|     | BP | GO:0032989 | cellular component morphogenesis                                                     | 0.030800821 |
|     | BP | GO:0000904 | cell morphogenesis involved in differentiation                                       | 0.032008697 |
|     | BP | GO:0098609 | cell-cell adhesion                                                                   | 0.036477835 |
|     | BP | GO:0031175 | neuron projection development                                                        | 0.038772799 |
|     | BP | GO:0022603 | regulation of anatomical structure morphogenesis                                     | 0.042879575 |
|     | BP | GO:0000902 | cell morphogenesis                                                                   | 0.046865563 |
|     | BP | GO:0048666 | neuron development                                                                   | 0.046986351 |
|     | BP | GO:0036002 | pre-mRNA binding                                                                     | 0.001193576 |
|     | BP | GO:0033120 | positive regulation of RNA splicing                                                  | 0.001570238 |
|     | BP | GO:0000381 | regulation of alternative mRNA splicing, via spliceosome                             | 0.002174176 |
|     | BP | GO:0000380 | alternative mRNA splicing, via spliceosome                                           | 0.002778113 |
|     | BP | GO:0048024 | regulation of mRNA splicing, via spliceosome                                         | 0.003865201 |
|     | BP | GO:1903313 | positive regulation of mRNA metabolic process                                        | 0.004227564 |
|     | BP | GO:0050684 | regulation of mRNA processing                                                        | 0.006039377 |
|     | BP | GO:0043484 | regulation of RNA splicing                                                           | 0.006522527 |
|     | BP | GO:1903311 | regulation of mRNA metabolic process                                                 | 0.011957966 |
|     | BP | GO:0000375 | RNA splicing, via transesterification reactions                                      | 0.014132142 |
|     | BP | GO:0000377 | RNA splicing, via transesterification reactions with bulged adenosine as nucleophile | 0.014132142 |
|     | BP | GO:0000398 | mRNA splicing, via spliceosome                                                       | 0.014132142 |
|     | BP | GO:0008380 | RNA splicing                                                                         | 0.020896244 |
|     | BP | GO:0006397 | mRNA processing                                                                      | 0.024278294 |
|     | BP | GO:0016071 | mRNA metabolic process                                                               | 0.03478681  |
|     | BP | GO:0006396 | RNA processing                                                                       | 0.046744776 |
|     | BP | GO:0010628 | positive regulation of gene expression                                               | 0.046744776 |
| SNT | MF | GO:0016755 | transferase activity, transferring amino-acyl groups                                 | 0.002819344 |
|     | MF | GO:0019838 | growth factor binding                                                                | 0.013625882 |
|     | MF | GO:0004714 | transmembrane receptor protein tyrosine kinase activity                              | 0.014487861 |
|     | MF | GO:0004713 | protein tyrosine kinase activity                                                     | 0.016425938 |
|     | MF | GO:0019199 | transmembrane receptor protein kinase activity                                       | 0.017501823 |
|     | MF | GO:0016746 | transferase activity, transferring acyl groups                                       | 0.031007528 |
|     | CC | GO:0009986 | cell surface                                                                         | 0.001921094 |
|     | CC | GO:0062023 | collagen-containing extracellular matrix                                             | 0.020995108 |
|     | CC | GO:0005938 | cell cortex                                                                          | 0.02515855  |
|     | CC | GO:0009897 | external side of plasma membrane                                                     | 0.025752362 |
|     | CC | GO:0030312 | external encapsulating structure                                                     | 0.03698902  |
|     | CC | GO:0031012 | extracellular matrix                                                                 | 0.03698902  |
|     | CC | GO:0098552 | side of membrane                                                                     | 0.046969343 |
|     | BP | GO:0032633 | interleukin-4 production                                                             | 0.004342575 |
|     | BP | GO:0032673 | regulation of interleukin-4 production                                               | 0.004342575 |
|     | BP | GO:0032733 | positive regulation of interleukin-10 production                                     | 0.005065113 |
|     | BP | GO:0032743 | positive regulation of interleukin-2 production                                      | 0.005065113 |

|    |            |                                                                        |             |
|----|------------|------------------------------------------------------------------------|-------------|
| BP | GO:0043372 | positive regulation of CD4-positive, alpha-beta T cell differentiation | 0.005065113 |
| BP | GO:2000516 | positive regulation of CD4-positive, alpha-beta T cell activation      | 0.005065113 |
| BP | GO:0010837 | regulation of keratinocyte proliferation                               | 0.005787302 |
| BP | GO:0010518 | positive regulation of phospholipase activity                          | 0.006148265 |
| BP | GO:0046638 | positive regulation of alpha-beta T cell differentiation               | 0.006509141 |
| BP | GO:0010517 | regulation of phospholipase activity                                   | 0.006869929 |
| BP | GO:0046635 | positive regulation of alpha-beta T cell activation                    | 0.006869929 |
| BP | GO:0060193 | positive regulation of lipase activity                                 | 0.006869929 |
| BP | GO:0032613 | interleukin-10 production                                              | 0.00723063  |
| BP | GO:0032653 | regulation of interleukin-10 production                                | 0.00723063  |
| BP | GO:0043616 | keratinocyte proliferation                                             | 0.007591244 |
| BP | GO:0043370 | regulation of CD4-positive, alpha-beta T cell differentiation          | 0.008312209 |
| BP | GO:0032623 | interleukin-2 production                                               | 0.009393002 |
| BP | GO:0032663 | regulation of interleukin-2 production                                 | 0.009393002 |
| BP | GO:0046637 | regulation of alpha-beta T cell differentiation                        | 0.009393002 |
| BP | GO:0060191 | regulation of lipase activity                                          | 0.009393002 |
| BP | GO:0048701 | embryonic cranial skeleton morphogenesis                               | 0.009753092 |
| BP | GO:2000514 | regulation of CD4-positive, alpha-beta T cell activation               | 0.010113094 |
| BP | GO:0045582 | positive regulation of T cell differentiation                          | 0.012630669 |
| BP | GO:0046634 | regulation of alpha-beta T cell activation                             | 0.012630669 |
| BP | GO:0043367 | CD4-positive, alpha-beta T cell differentiation                        | 0.013708322 |
| BP | GO:1904888 | cranial skeletal system development                                    | 0.014067365 |
| BP | GO:0045621 | positive regulation of lymphocyte differentiation                      | 0.015143972 |
| BP | GO:0035710 | CD4-positive, alpha-beta T cell activation                             | 0.016219794 |
| BP | GO:0046632 | alpha-beta T cell differentiation                                      | 0.017653006 |
| BP | GO:0048704 | embryonic skeletal system morphogenesis                                | 0.020157775 |
| BP | GO:0045580 | regulation of T cell differentiation                                   | 0.021229942 |
| BP | GO:0050680 | negative regulation of epithelial cell proliferation                   | 0.021587158 |
| BP | GO:0046631 | alpha-beta T cell activation                                           | 0.022658282 |
| BP | GO:0045619 | regulation of lymphocyte differentiation                               | 0.025866965 |
| BP | GO:0048706 | embryonic skeletal system development                                  | 0.02657905  |
| BP | GO:1902107 | positive regulation of leukocyte differentiation                       | 0.026934963 |
| BP | GO:1903708 | positive regulation of hemopoiesis                                     | 0.026934963 |
| BP | GO:0050870 | positive regulation of T cell activation                               | 0.02800218  |
| BP | GO:1903039 | positive regulation of leukocyte cell-cell adhesion                    | 0.030844277 |
| BP | GO:0046777 | protein autophosphorylation                                            | 0.033326563 |
| BP | GO:0022409 | positive regulation of cell-cell adhesion                              | 0.036158267 |
| BP | GO:0051251 | positive regulation of lymphocyte activation                           | 0.03651184  |
| BP | GO:0001818 | negative regulation of cytokine production                             | 0.039337317 |
| BP | GO:0030217 | T cell differentiation                                                 | 0.040395445 |
| BP | GO:0002696 | positive regulation of leukocyte activation                            | 0.043565166 |
| BP | GO:0050863 | regulation of T cell activation                                        | 0.043565166 |
| BP | GO:1903037 | regulation of leukocyte cell-cell adhesion                             | 0.043565166 |
| BP | GO:0050867 | positive regulation of cell activation                                 | 0.043916926 |
| BP | GO:0048705 | skeletal system morphogenesis                                          | 0.045674431 |
| BP | GO:1902105 | regulation of leukocyte differentiation                                | 0.045674431 |

---

**Table S2.** Enrichment Analysis of KEGG Pathway of candidate genes for Reproductive traits

| Trait | ID       | Description                                                | p-value     |
|-------|----------|------------------------------------------------------------|-------------|
| ALS6  | chx00534 | Glycosaminoglycan biosynthesis - heparan sulfate / heparin | 0.013504191 |
|       | chx04080 | Neuroactive ligand-receptor interaction                    | 0.015078267 |
|       | chx05033 | Nicotine addiction                                         | 0.022425641 |
|       | chx05030 | Cocaine addiction                                          | 0.027968689 |
|       | chx04730 | Long-term depression                                       | 0.033486563 |
|       | chx04720 | Long-term potentiation                                     | 0.036785241 |
|       | chx05031 | Amphetamine addiction                                      | 0.038979351 |
| UD    | chx04964 | Proximal tubule bicarbonate reclamation                    | 0.00260181  |
|       | chx04960 | Aldosterone-regulated sodium reabsorption                  | 0.004298643 |
|       | chx04973 | Carbohydrate digestion and absorption                      | 0.005316742 |
|       | chx04961 | Endocrine and other factor-regulated calcium reabsorption  | 0.005882353 |
|       | chx04978 | Mineral absorption                                         | 0.00678733  |
|       | chx04918 | Thyroid hormone synthesis                                  | 0.008710407 |
|       | chx04971 | Gastric acid secretion                                     | 0.008936652 |
|       | chx04911 | Insulin secretion                                          | 0.009841629 |
|       | chx04260 | Cardiac muscle contraction                                 | 0.010294118 |
|       | chx04970 | Salivary secretion                                         | 0.010633484 |
|       | chx04925 | Aldosterone synthesis and secretion                        | 0.010746606 |
|       | chx04972 | Pancreatic secretion                                       | 0.011877828 |
|       | chx04976 | Bile secretion                                             | 0.012330317 |
|       | chx04919 | Thyroid hormone signaling pathway                          | 0.013800905 |
|       | chx04974 | Protein digestion and absorption                           | 0.016628959 |
|       | chx04261 | Adrenergic signaling in cardiomyocytes                     | 0.017081448 |
|       | chx04022 | cGMP-PKG signaling pathway                                 | 0.019004525 |
|       | chx04024 | cAMP signaling pathway                                     | 0.026696833 |
|       | TD       | Cell adhesion molecules                                    | 0.018099548 |
|       | chx04360 | Axon guidance                                              | 0.020361991 |
| TL    | chx03060 | Protein export                                             | 0.002714932 |
| SNT   | chx05230 | Central carbon metabolism in cancer                        | 0.007692308 |
|       | chx01521 | EGFR tyrosine kinase inhibitor resistance                  | 0.009049774 |
|       | chx05215 | Prostate cancer                                            | 0.010972851 |
|       | chx04550 | Signaling pathways regulating pluripotency of stem cells   | 0.016176471 |
|       | chx05226 | Gastric cancer                                             | 0.01719457  |
|       | chx04015 | Rap1 signaling pathway                                     | 0.023868778 |
|       | chx04810 | Regulation of actin cytoskeleton                           | 0.024886878 |
|       | chx04014 | Ras signaling pathway                                      | 0.02658371  |
|       | chx04020 | Calcium signaling pathway                                  | 0.026923077 |
|       | chx04144 | Endocytosis                                                | 0.028959276 |
|       | chx04010 | MAPK signaling pathway                                     | 0.033371041 |
|       | chx04151 | PI3K-Akt signaling pathway                                 | 0.041742081 |
